# Supplementary material for: Single boron modulated graphdiyne nanosheets for efficient electrochemical nitrogen fixation: a first-principles study
Source: Royal Society of Chemistry journal article supplement (doi:10.1039/d2cp01711c), 2022-01-01
Supplement: d2cp01711c1.pdf [file d2cp01711c1.pdf]

## Supporting Information

### Single boron modulated Graphdiyne nanosheet for efficient electrochemical nitrogen fixation: A First-Principles Study

Cheng Fu, Yafei Li\* and Haiyan Wei\*

---

*\*Jiangsu Key Laboratory of Biofunctional Materials, School of Chemistry and Materials Science, Jiangsu Key Lab for NSLSCS, Nanjing Normal University, Nanjing 210097, China. E-mail: liyafei@njnu.edu.cn, weihaiyan@njnu.edu.cn*

Electronic Supplementary Information (ESI) available: [details of any supplementary information available should be included here]. See DOI: 10.1039/x0xx00000x

- 1. Table S1.** The calculated N<sub>2</sub> adsorption energies for B@GDY configurations via end-on and side-on mode, together with bond lengths and Bader charge values of catalytic models.
- 2. Fig. S1.** The cohesive energies of pristine GDY and single boron atom doped B@GDY configurations.
- 3. Fig. S2.** Schematic depiction of the enzymatic and consecutive pathways for N<sub>2</sub> reduction via side-on mode of N<sub>2</sub> adsorption.
- 4. Fig. S3.** Potential energy surfaces for NRR on B(A<sub>2</sub>)@GDY configuration through (a) alternating, (b) distal mechanisms at different applied potentials, together with free energy and (c) the relative geometric structures for each elementary step.
- 5. Fig. S4.** Potential energy surfaces for NRR on B(A<sub>3</sub>)@GDY configuration through (a) alternating, (b) distal mechanisms at different applied potentials, together with free energy and (c) the relative geometric structures for each elementary step.
- 6. Fig. S5.** (a) Free energy diagram for the HER on B(S<sub>3</sub>)@GDY and (b) the corresponding structures of B(S<sub>3</sub>)@GDY with H atom adsorbed after optimization.
- 7. Fig. S6.** Partial density of states (PDOS) of N<sub>2</sub> molecule adsorbed on B(S<sub>2</sub>)@GDY and the Fermi level is set to zero, as shown by the black dashed line.

**Table S1.** The calculated N<sub>2</sub> adsorption energies for B@GDY configurations via end-on and side-on mode, together with bond lengths and Bader charge values of catalytic models.

| Configuration          | Adsorption<br>energy<br>(E <sub>ads</sub> /eV) | Bond length (Å) |      | Bader charge value (q/e)          |                                  |          |             |      |
|------------------------|------------------------------------------------|-----------------|------|-----------------------------------|----------------------------------|----------|-------------|------|
|                        |                                                | N-N             | B-N  | B atom                            |                                  | N atom   |             |      |
|                        |                                                |                 |      | before<br>N <sub>2</sub> fixation | after<br>N <sub>2</sub> fixation | proximal | distal      |      |
| B(S <sub>2</sub> )@GDY | end-on                                         | -0.12           | 1.13 | 1.48                              | 1.83                             | 1.86     | -0.56       | 0.19 |
| B(S <sub>3</sub> )@GDY | end-on                                         | -0.08           | 1.13 | 1.50                              | 1.85                             | 1.90     | -0.54       | 0.23 |
|                        | side-on                                        | 1.79            | 1.20 | 1.61                              | 1.85                             | 1.82     | -0.22/0.01  |      |
| B(A <sub>1</sub> )@GDY | end-on                                         | 0.29            | 1.13 | 1.53                              | 1.56                             | 1.60     | -0.54       | 0.27 |
|                        | side-on                                        | 0.89            | 1.22 | 1.55/1.56                         | 1.56                             | 1.77     | -0.48/-0.40 |      |
| B(A <sub>2</sub> )@GDY | end-on                                         | -1.22           | 1.16 | 1.38                              | 1.19                             | 1.73     | -0.86       | 0.20 |
|                        | side-on                                        | -0.12           | 1.21 | 1.57/1.64                         | 1.19                             | 1.78     | -0.50/-0.37 |      |
| B(A <sub>3</sub> )@GDY | end-on                                         | -0.96           | 1.16 | 1.39                              | 1.08                             | 1.82     | -0.83       | 0.15 |
|                        | side-on                                        | -0.31           | 1.22 | 1.55/1.56                         | 1.08                             | 1.87     | -0.42/-0.29 |      |

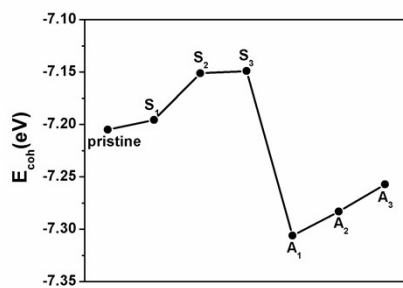

| Configuration         | pristine<br>GDY | B(S <sub>1</sub> )@GDY | B(S <sub>2</sub> )@GDY | B(S <sub>3</sub> )@GDY | B(A <sub>1</sub> )@GDY | B(A <sub>2</sub> )@GDY | B(A <sub>3</sub> )@GDY |
|-----------------------|-----------------|------------------------|------------------------|------------------------|------------------------|------------------------|------------------------|
| $E_{\text{coh}}$ (eV) | -7.205          | -7.196                 | -7.151                 | -7.149                 | -7.306                 | -7.283                 | -7.257                 |

**Fig. S1.** The cohesive energies of pristine GDY and single boron atom doped B@GDY configurations.

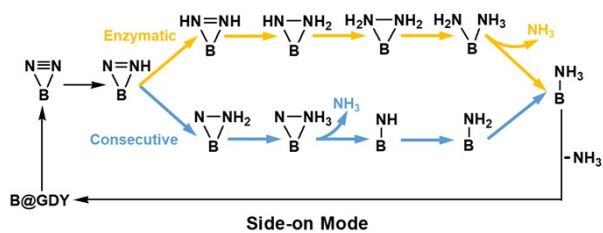

**Fig. S2.** Schematic depiction of the enzymatic and consecutive pathways for  $\text{N}_2$  reduction via side-on mode of  $\text{N}_2$  adsorption.

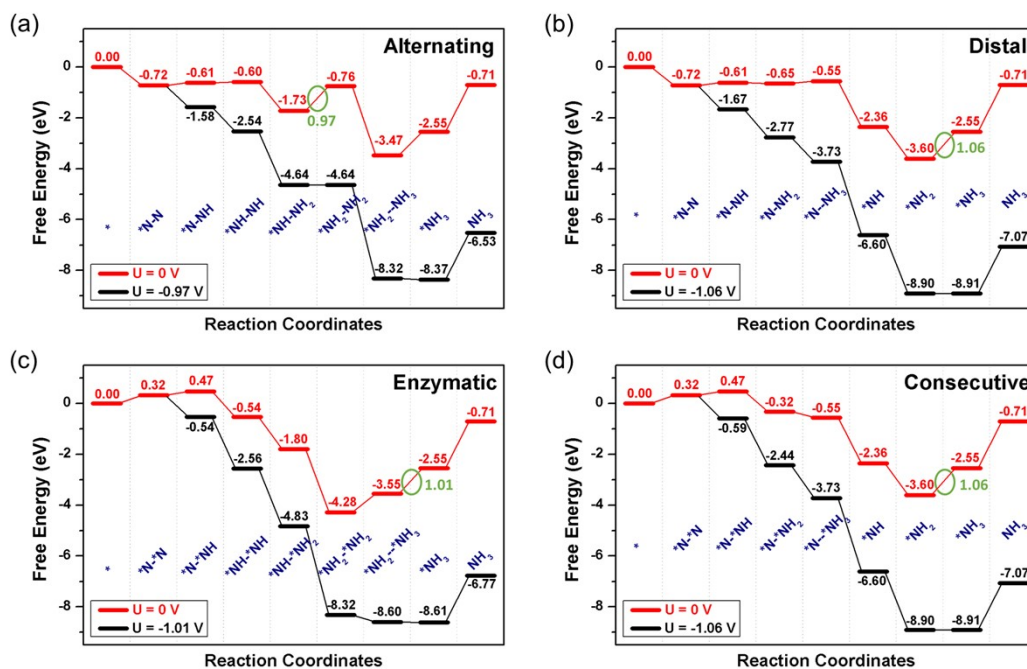

**Fig. S3.** Potential energy surfaces for NRR on B(A<sub>2</sub>)@GDY configuration through (a) alternating, (b) distal mechanisms at different applied potentials, together with free energy and (c) the relative geometric structures for each elementary step.

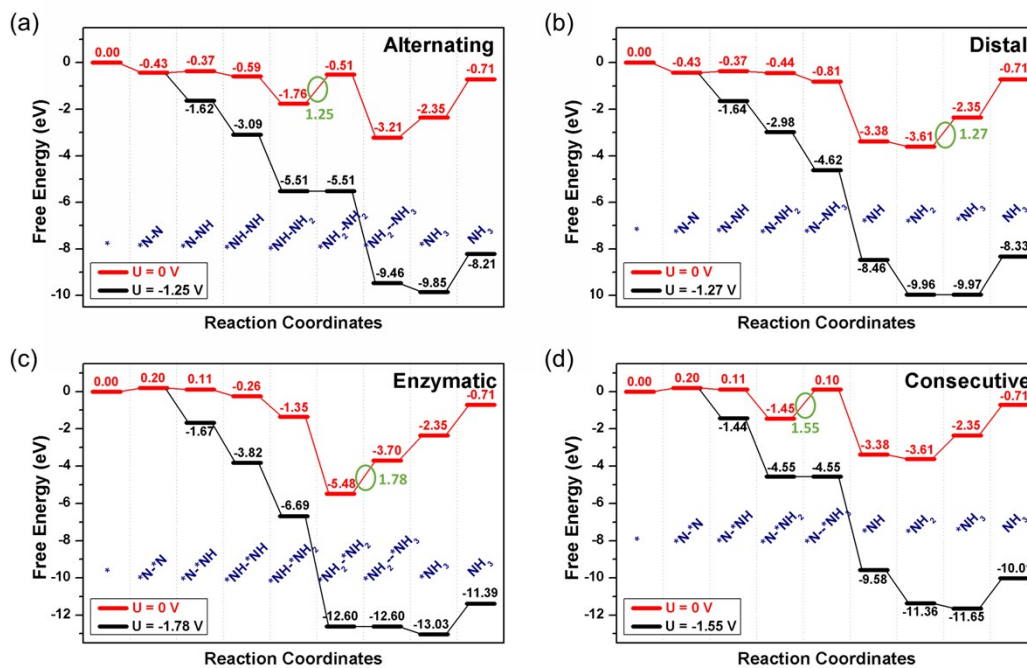

**Fig. S4.** Potential energy surfaces for NRR on B(A<sub>3</sub>)@GDY configuration through (a) alternating, (b) distal mechanisms at different applied potentials, together with free energy and (c) the relative geometric structures for each elementary step.

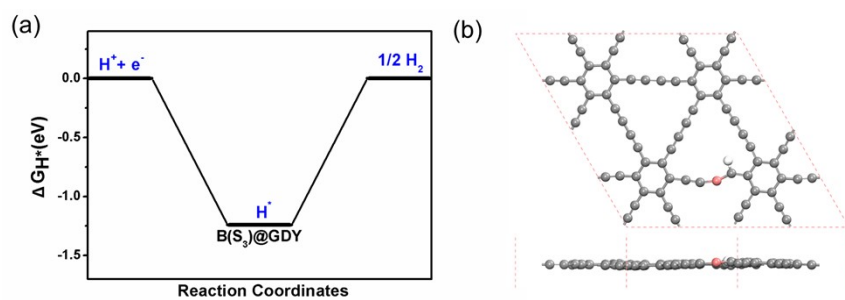

**Fig. S5.** (a) Free energy diagram for the HER on  $B(S_3)@GDY$  and (b) the corresponding structures of  $B(S_3)@GDY$  with H atom adsorbed after optimization.

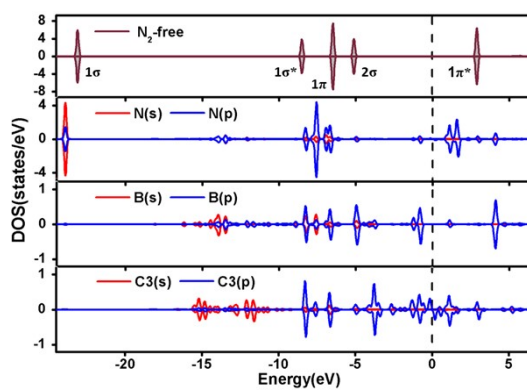

**Fig. S6.** Partial density of states (PDOS) of  $N_2$  molecule adsorbed on  $B(S_2)@GDY$  and the Fermi level is set to zero, as shown by the black dashed line.
